# Supplementary material for: A Web-Based Decision Tool to Improve Contraceptive Counseling for Women With Chronic Medical Conditions: Protocol For a Mixed Methods Implementation Study
Source: JMIR Res Protoc. 2018 Apr 18;7(4):e107. doi: 10.2196/resprot.9249 (PMC5932336; doi:10.2196/resprot.9249)
Supplement: Multimedia Appendix 4 [file resprot_v7i4e107_app4.pdf]

| Adapted Constructs                                                                                                                                   | Quantitative Data                                                                                                                                                                                                                                                                     | Data Source & Items | Qualitative Data                                                                                                                                                                                                                                                                                                                           | Data Source & Items |
|------------------------------------------------------------------------------------------------------------------------------------------------------|---------------------------------------------------------------------------------------------------------------------------------------------------------------------------------------------------------------------------------------------------------------------------------------|---------------------|--------------------------------------------------------------------------------------------------------------------------------------------------------------------------------------------------------------------------------------------------------------------------------------------------------------------------------------------|---------------------|
| <b>Knowledge:</b> familiarity with CDC evidence based guidelines for contraceptive use in women with selected characteristics and medical conditions | Assuming a patient requests an IUD, would you recommend this method in the following scenarios: (less than 20 years old, has never been pregnant, taking medications for well controlled hypertension, taking insulin for diabetes with retinopathy)                                  | PS 16               | <p>Clinical Vignette 1:<br/>Women with diabetes presents for well woman visit: “Tell me how you would typically approach this visit...”</p> <p>Clinical Vignette 1: Same patient presents for chronic care visit: “Tell me how you would typically approach this visit.”<br/>[follow up prompts regarding approach to family planning]</p> | PG 1, 5             |
|                                                                                                                                                      | Assuming a patient requests an oral contraceptive pill with estrogen, would you recommend this method in the following scenarios: (never had a pap smear, is a 25 year old smoker, taking medications for well controlled hypertension, taking insulin for diabetes with retinopathy) | PS 17               |                                                                                                                                                                                                                                                                                                                                            |                     |
|                                                                                                                                                      | Are you aware of the US MEC, a clinical resource to guide the selection of contraceptive methods based upon patient characteristics and medical conditions?                                                                                                                           | PS 18               |                                                                                                                                                                                                                                                                                                                                            |                     |
| <b>Skills:</b> current scope of contraceptive practice, current approach to contraceptive care for women with medical conditions                     | Please indicate if you prescribe the following contraceptive methods/ insert the following contraceptive devices/refer women who request contraceptive devices                                                                                                                        | PS 11-14            |                                                                                                                                                                                                                                                                                                                                            |                     |
| <b>Beliefs about capabilities:</b> self-perception of ability to deliver contraceptive care                                                          | Please indicate if you feel prepared to discuss the following contraceptive methods with a patient: (list of all reversible methods)                                                                                                                                                  | PS 11               | What information would you need to feel more prepared to discuss these methods?                                                                                                                                                                                                                                                            | PG 6                |
|                                                                                                                                                      |                                                                                                                                                                                                                                                                                       |                     | Are there clinical situations/medical conditions that are more challenging than others?                                                                                                                                                                                                                                                    | PG 7                |

Notes: Provider Survey (PS) 19 item survey with multiple choice questions; Provider Interview Guide (PG): Semi-structured 13 question interview guide with a clinical vignette; IUD= Intrauterine device
