# Supplementary material for: A Web-Based Decision Tool to Improve Contraceptive Counseling for Women With Chronic Medical Conditions: Protocol For a Mixed Methods Implementation Study
Source: PubMed Central journal article supplement (PMC5932336; doi:10.2196/resprot.9249), 2018-04-18
Supplement: resprot_v7i4e107_app1.pdf [file resprot_v7i4e107_app1.pdf]

**Table 1. Qualitative sampling matrix: patients, primary care providers, and practice staff members.**

| <b>Patients</b>                                                                                                                                                  | <b>Primary care providers</b>                                                                                                                                                                                               | <b>Practice staff members</b>                                                                                                                                                                       |
|------------------------------------------------------------------------------------------------------------------------------------------------------------------|-----------------------------------------------------------------------------------------------------------------------------------------------------------------------------------------------------------------------------|-----------------------------------------------------------------------------------------------------------------------------------------------------------------------------------------------------|
| <b>Psychiatric conditions:</b><br>depression, anxiety, attention deficit hyperactivity syndrome, bipolar disease, use of controlled substances, substance abuse. | <b>No contraceptive Rx<sup>b</sup>:</b> providers who do not provide any contraception that requires a prescription.                                                                                                        | <b>Director and managers:</b> staff who have supervisory responsibilities and oversight of clinical and financial aspects of the practice (eg, clinical director, medical director, nurse manager). |
| <b>Metabolic and endocrine conditions:</b> diabetes, high blood pressure, high cholesterol, morbid obesity, thyroid problems.                                    | <b>Contraceptive Rx<sup>b</sup>, No LARC<sup>c</sup>:</b> providers who provide contraceptive prescriptions (eg, pill, patch, ring, shot) but do not insert and remove long-acting reversible methods (LARC) <sup>c</sup> . | <b>Work with PCPs<sup>a</sup>:</b> staff who assist PCPs during clinical visits and directly interact with patients (eg, nurses, medical assistants, licensed practical nurses).                    |
| <b>Neurologic conditions:</b><br>epilepsy, migraines, chronic pain, multiple sclerosis.                                                                          | <b>Contraceptive Rx and LARC<sup>c</sup>:</b> providers who provide contraceptive prescriptions (eg, pill, patch, ring, shot) AND insert and remove long-acting reversible methods (LARC) <sup>c</sup> .                    | <b>Other services:</b> other staff who may interact with women with chronic conditions (eg, social workers, pharmacists, behavioral counselors, complex care managers).                             |
| 4.Other: clotting disorders, bleeding disorders, cancer, HIV/AIDs, rheumatologic disorders, gastrointestinal disorders.                                          |                                                                                                                                                                                                                             |                                                                                                                                                                                                     |

Notes:

<sup>a</sup>PCPs: primary care providers.

<sup>b</sup>Rx: prescription.
