# Supplementary material for: A Web-Based Decision Tool to Improve Contraceptive Counseling for Women With Chronic Medical Conditions: Protocol For a Mixed Methods Implementation Study
Source: PubMed Central journal article supplement (PMC5932336; doi:10.2196/resprot.9249), 2018-04-18
Supplement: resprot_v7i4e107_app2.pdf [file resprot_v7i4e107_app2.pdf]

**Table 2a. Mixed Methods Theory Data Matrix: Mapping data to Consolidated Framework for Implementation Research (CFIR) Inner Setting Constructs**

| Adapted Constructs                                                                                                                                                                                                               | Quantitative Data                                                                                                                                                                                                                                                                                                            | Data Source & Items                                                                                              | Qualitative Data                                                                                                                                                           | Data Source & Items  |
|----------------------------------------------------------------------------------------------------------------------------------------------------------------------------------------------------------------------------------|------------------------------------------------------------------------------------------------------------------------------------------------------------------------------------------------------------------------------------------------------------------------------------------------------------------------------|------------------------------------------------------------------------------------------------------------------|----------------------------------------------------------------------------------------------------------------------------------------------------------------------------|----------------------|
| <b>INNER SETTING</b>                                                                                                                                                                                                             |                                                                                                                                                                                                                                                                                                                              |                                                                                                                  |                                                                                                                                                                            |                      |
| <p><b><u>Structural characteristics:</u></b> age, maturity of the practice, external and internal infrastructure, clinical processes that affect women' experience of care, with focus on women's health/reproductive health</p> | <p>Rural, suburban, urban location?<br/>Any special federal designations?<br/>Clinical specialties represented<br/>How many providers?<br/>Who owns the practice?<br/>How old is the practice?<br/>How many practice sites?<br/>Patient demographics<br/>Use of EMR, web portals?<br/>Patient scheduling, access, volume</p> | <p>PIF 1<br/>PIF 2<br/>PIF 3<br/>PIF 4<br/>PIF 5<br/>PIF 9<br/>PIF 10<br/>PIF 11-14<br/>PIF 13<br/>PIF 15-20</p> | <p>Location<br/><br/>Waiting room observations<br/><br/>Clinical flow<br/><br/>Physical structure of building<br/>Exam rooms and equipment<br/><br/>Interior structure</p> | <p>PET</p>           |
| <p><b><u>Networks &amp; Communications:</u></b> networks and communications that facilitate practice research engagement, population management of women with medical conditions, access to birth control and LARC</p>           | <p>Is the practice part of a Research Network?</p>                                                                                                                                                                                                                                                                           | <p>PIF 8</p>                                                                                                     | <p>Does your practice have system wide prompts or workflows to promote preventive care? Please give an example.</p>                                                        | <p>PG 1</p>          |
|                                                                                                                                                                                                                                  | <p>System to track and manage patients with specific conditions?</p>                                                                                                                                                                                                                                                         | <p>PIF 24</p>                                                                                                    | <p>Are there system prompts for medications that may cause fetal defects? What are your thoughts about that?</p>                                                           | <p>PG 1<br/>SG 1</p> |
|                                                                                                                                                                                                                                  | <p>How would you manage/refer a patient who wants LARC?</p>                                                                                                                                                                                                                                                                  | <p>PS 14</p>                                                                                                     | <p>You noted that you would recommend X if a patient requested an IUD or implant. Can you walk me through how this typically proceeds?</p>                                 | <p>PG 8</p>          |

|                                                                                                                                                                                       |                                                                                                                                             |                     |                                                                                                                                                                                |      |
|---------------------------------------------------------------------------------------------------------------------------------------------------------------------------------------|---------------------------------------------------------------------------------------------------------------------------------------------|---------------------|--------------------------------------------------------------------------------------------------------------------------------------------------------------------------------|------|
| <b>Learning climate:</b><br>degree to which practice climate is conducive to change process based upon team dynamics and relationships                                                |                                                                                                                                             |                     | Nature of relationships and interactions among practice team, reactions to stress, team planning                                                                               | PET  |
| <b>Implementation Climate</b><br><b>Relative priority:</b><br>current clinical services and stakeholders' attitudes that reflect relative priority of family planning in the practice | Which services are offered in this practice? (cervical cancer screening, miscarriage care, prenatal services, reproductive health services) | PIF 21, SS 6        | What do the providers consider to be the top priority health topics to address during a well woman exam?                                                                       | SG 4 |
|                                                                                                                                                                                       |                                                                                                                                             |                     | There are often competing demands during a well exam. If there is limited time, which health topics are most important for you to address with Mrs. Gold (clinical vignette 1) | PG 2 |
|                                                                                                                                                                                       | Which contraceptive options are offered in this practice?                                                                                   | PIF 22, SS 8        | Studies show that birth control is not routinely addressed during the well woman visit. Based upon our experience what may contribute to this finding?                         | SG 4 |
|                                                                                                                                                                                       | Does your practice have clinical protocols or policies for prescribing birth control? For providing LARC?                                   | PIF 23, SS 9        | How do patients get birth control prescriptions or refills? Can you give me an example?                                                                                        | SG 7 |
|                                                                                                                                                                                       | Does your practice offer LARC insertion and/or referral for LARC insertion?                                                                 | PIF 25-29, SS 10-11 | What happens if a patient requests an IUD? An implant?                                                                                                                         | SG 8 |

Notes for Tables 2a and 2b. Practice Information Form (**PIF**): 29 item survey with multiple choice and open response items completed by practice liaison regarding key practice characteristics; Practice Environment Template (**PET**): Semi-structured template for practice observations; Provider Survey (**PS**) 19 item survey with multiple choice questions; Provider Interview Guide (**PG**): Semi-structured 13 question interview guide with a clinical vignette; Staff Survey (**SS**) 13 multiple choice items; Staff Interview Guide (**SG**); Semi-structured structured 9 question interview guide; **LARC** (long-acting reversible contraceptives); Consolidated Framework for Implementation Research (**CFIR**) constructs and definitions: <http://www.cfirguide.org/constructs.html>
